# Supplementary material for: A Preliminary Randomized Double Blind Placebo-Controlled Trial of Intravenous Immunoglobulin for Japanese Encephalitis in Nepal
Source: PLoS One. 2015 Apr 17;10(4):e0122608. doi: 10.1371/journal.pone.0122608 (PMC4401695; doi:10.1371/journal.pone.0122608)
Supplement: S8 Table — (XLS) [file pone.0122608.s012.xls]

## Sheet: PRNT data  raw
Table S8. PRNT and cytokine levels (raw data)
	Treatment	JE status	Pre	Post	Diff
	IVIG	JE POSITIVE	80	5120	5040
	IVIG	JE POSITIVE	320	20480	20160
	IVIG	JE POSITIVE	640	2560	1920
	IVIG	JE POSITIVE	160	2560	2400
	IVIG	JE POSITIVE	160	320	160
	IVIG	JE POSITIVE	320	640	320
	IVIG	JE POSITIVE	5120	5120	0
	IVIG	NEGATIVE	0	160	160
	IVIG	NEGATIVE	0	80	80
	IVIG	NEGATIVE	0		na
	IVIG	NEGATIVE	0	320	na
	SALINE	JE POSITIVE	160	320	160
	SALINE	JE POSITIVE	160	320	160
	SALINE	JE POSITIVE	10	160	150
	SALINE	JE POSITIVE	2560	1280	-1280
	SALINE	JE POSITIVE	320	1280	960
	SALINE	JE POSITIVE	80	5120	5040
	SALINE	NEGATIVE	0	0	0
	SALINE	NEGATIVE	0	0	0
	SALINE	NEGATIVE	0	0	0
	SALINE	NEGATIVE	10	0	-10
	SALINE	NEGATIVE	20	20	0

## Sheet: IL4 raw
Treatment	JE status cdc	Pre	Post	diff
IVIG	P	-0.08725	0.15025	0.2375
IVIG	P	-0.01328	0.017115	0.030395
IVIG	P	-0.16087	-0.1079	0.05297
IVIG	P	-0.23955	-0.24705	-0.0075
IVIG	P	0.04971	0.15124	0.10153
IVIG	N	0.2744	1.42535	1.15095
IVIG	N	-0.12015	0.3662	0.48635
IVIG	N	-0.16087	0.48715	0.64802
Saline	P	-0.0496	0.21046	0.26006
Saline	P	0.030275	0.0393655	0.0090905
Saline	P	-0.10479	0.02808	0.13287
Saline	P	0.02025	0.05407	0.03382
Saline	P	-0.01295	-0.24235	-0.2294
Saline	P	0.043755	-0.0524695	-0.0962245
Saline	N	0.12366	0.05849	-0.06517
Saline	N	-0.042425	-0.0371	0.005325
Saline	N	-0.110135	0.087305	0.19744
Saline	N	0.00675	-0.0346	-0.04135

## Sheet: IL6 raw
treatment	je status cdc	1st sera-PRE	3rd sera-POST	diff
IVIG	p	0.067	0.2005	0.1335
IVIG	p	0.6785	1.696	1.0175
IVIG	p	0.838	0.989	0.151
IVIG	p	0.479	2.9845	2.5055
IVIG	p	1.5585	3.273	1.7145
IVIG	n	-0.0935	0.4135	0.507
IVIG	n	0.4535	2.852	2.3985
IVIG	n	1.9455	3.273	1.3275
Saline	p	0.0955	0.0515	-0.044
Saline	p	0.5845	0.827	0.2425
Saline	p	0.3655	0.792	0.4265
Saline	p	1.477	2.415	0.938
Saline	p	-0.028	0.416	0.444
Saline	p	0.612	0.9945	0.3825
Saline	n	0.464	0.2745	-0.1895
Saline	n	1.6005	0.767	-0.8335
Saline	n	-0.083	0.6485	0.7315
Saline	n	0.457	2.134	1.677
